# Supplementary material for: Extract from <em>Aronia melanocarpa </em>L. Berries Prevents Cadmium-induced Oxidative Stress in the Liver: a Study in a Rat Model of Low-level and Moderate Lifetime Human Exposure to this Toxic Metal
Source: Preprints.org preprint supplement (doi:10.20944/preprints201811.0160.v1), 2018-11-07
Supplement: Supplementary file 1 [file supplementary]

Supplementary Materials

**Extract from *Aronia melanocarpa* L. Berries Prevents Cadmium-induced Oxidative Stress in the Liver: a Study in a Rat Model of Low-level and Moderate Lifetime Human Exposure to this Toxic Metal**

**Magdalena Mężyńska\*, Malgorzata M. Brzoska\*, Joanna Rogalska**

Department of Toxicology, Medical University of Bialystok, Adama Mickiewicza 2C street, 15-222 Bialystok, Poland; joanna.rogalska@umb.edu.pl

\*Correspondence: mmezynska1@student.umb.edu.pl; malgorzata.brzoska@umb.edu.pl; tel.: +48 85 7485604; fax: +48 85 7485834

**Table S1.** The concentration of cadmium (Cd) in the blood, liver, and urine of rats receiving the extract from the berries of *Aronia melanocarpa* L. (AE) and/or Cd.<sup>1, 2</sup>

| Group                             | Duration of the Experiment |                        |                        |                        |
|-----------------------------------|----------------------------|------------------------|------------------------|------------------------|
|                                   | 3 Months                   | 10 Months              | 17 Months              | 24 Months              |
| <b>Blood (µg/L)</b>               |                            |                        |                        |                        |
| Control                           | 0.0691 ± 0.0079            | 0.0860 ± 0.0091        | 0.0743 ± 0.0052        | 0.0834 ± 0.0043        |
| AE                                | 0.0752 ± 0.0046            | 0.0802 ± 0.0087        | 0.0718 ± 0.0099        | 0.0861 ± 0.0038        |
| Cd <sub>1</sub>                   | 0.1884 ± 0.0100*           | 0.1792 ± 0.0198*       | 0.2425 ± 0.0167**      | 0.2330 ± 0.0143**      |
| Cd <sub>1</sub> + AE              | 0.1887 ± 0.0124*           | 0.1844 ± 0.0137*       | 0.2375 ± 0.0166**      | 0.2188 ± 0.0143**      |
| Cd <sub>5</sub>                   | 1.0236 ± 0.066***          | 0.9394 ± 0.0439***     | 1.0339 ± 0.0266***     | 1.0467 ± 0.0508***     |
| Cd <sub>5</sub> + AE              | 0.8298 ± 0.0544*** †††     | 0.7948 ± 0.0454*** ††† | 0.9319 ± 0.0413*** ††† | 0.8503 ± 0.0600*** ††† |
| <b>Liver (µg/g)</b>               |                            |                        |                        |                        |
| Control                           | 0.0348 ± 0.0026            | 0.0231 ± 0.0011        | 0.0138 ± 0.0016        | 0.0137 ± 0.0015        |
| AE                                | 0.0312 ± 0.0014            | 0.0202 ± 0.0014        | 0.0145 ± 0.0019        | 0.014 ± 0.0016         |
| Cd <sub>1</sub>                   | 0.1447 ± 0.0093**          | 0.199 ± 0.028**        | 0.211 ± 0.019**        | 0.364 ± 0.025**        |
| Cd <sub>1</sub> + AE              | 0.0968 ± 0.007*** †††      | 0.179 ± 0.0179**       | 0.1913 ± 0.0168**      | 0.2275 ± 0.0335*** †   |
| Cd <sub>5</sub>                   | 0.912 ± 0.053**            | 1.617 ± 0.112**        | 2.449 ± 0.178**        | 2.755 ± 0.089**        |
| Cd <sub>5</sub> + AE              | 0.7427 ± 0.0045*** †††     | 1.4424 ± 0.0916*** ††† | 1.8479 ± 0.3144*** ††  | 2.4911 ± 0.1342*** ††  |
| <b>Urine (µg/g of creatinine)</b> |                            |                        |                        |                        |
| Control                           | 0.1387 ± 0.0103            | 0.1304 ± 0.0080        | 0.1491 ± 0.0103        | 0.1337 ± 0.0154        |
| AE                                | 0.1321 ± 0.0046            | 0.1364 ± 0.0043        | 0.1445 ± 0.0116        | 0.1357 ± 0.0070        |
| Cd <sub>1</sub>                   | 0.2184 ± 0.0081**          | 0.1809 ± 0.0194**      | 0.2096 ± 0.0215*       | 0.2053 ± 0.0155*       |
| Cd <sub>1</sub> + AE              | 0.2193 ± 0.0171**          | 0.1913 ± 0.0113**      | 0.2143 ± 0.0268*       | 0.2084 ± 0.0105*       |
| Cd <sub>5</sub>                   | 0.5008 ± 0.0234**          | 0.4002 ± 0.0480**      | 0.4147 ± 0.0390**      | 0.4104 ± 0.0198**      |
| Cd <sub>5</sub> + AE              | 0.6064 ± 0.0374*** †††     | 0.4997 ± 0.0400*** ††† | 0.5773 ± 0.0420*** ††† | 0.4994 ± 0.0438*** ††† |

<sup>1</sup> The rats received 0.1% aqueous AE and Cd in diet at the concentration of 1 or 5 mg/kg for 3–24 months.

<sup>2</sup> Data are represented as mean ± SE for 8 rats (except for 7 animals in the AE, Cd<sub>1</sub>, and Cd<sub>5</sub> groups after 24 months). Statistically significant differences (ANOVA, Duncan's multiple range test) compared to the control group (\*  $p < 0.05$ , \*\*  $p < 0.01$ , \*\*\*  $p < 0.001$ ) and respective group receiving Cd alone (†  $p < 0.05$ , ††  $p < 0.01$ , †††  $p < 0.001$ ) are marked.

**Table S2.** The effect of the extract from the berries of *Aronia melanocarpa* L. (AE) on the concentration of cadmium (Cd) in the blood, liver and urine of rats. <sup>1, 2, 3</sup>

| Duration<br>(months) | Exposure to 1 mg Cd/kg diet |                      |                 | Exposure to 5 mg Cd/kg diet |                      |                 |
|----------------------|-----------------------------|----------------------|-----------------|-----------------------------|----------------------|-----------------|
|                      | Effect<br>of Cd             | Effect<br>of Cd + AE | Effect<br>of AE | Effect<br>of Cd             | Effect<br>of Cd + AE | Effect<br>of AE |
| <b>Blood</b>         |                             |                      |                 |                             |                      |                 |
| <b>3</b>             | ↑ 2.7-fold                  | ↑ 2.7-fold           | ↔               | ↑ 14.8-fold                 | ↑ 12-fold            | ✓ 19%           |
| <b>10</b>            | ↑ 2.1-fold                  | ↑ 2.1-fold           | ↔               | ↑ 11-fold                   | ↑ 9.2-fold           | ✓ 15%           |
| <b>17</b>            | ↑ 3.3-fold                  | ↑ 3.2-fold           | ↔               | ↑ 13.9-fold                 | ↑ 12.5-fold          | ✓ 9.9%          |
| <b>24</b>            | ↑ 2.8-fold                  | ↑ 2.6-fold           | ↔               | ↑ 12.5-fold                 | ↑ 10.2-fold          | ✓ 11%           |
| <b>Liver</b>         |                             |                      |                 |                             |                      |                 |
| <b>3</b>             | ↑ 4.2-fold                  | ↑ 2.8-fold           | ✓ 33%           | ↑ 26-fold                   | ↑ 21-fold            | ✓ 18%           |
| <b>10</b>            | ↑ 8.6-fold                  | ↑ 7.8-fold           | ↔               | ↑ 70-fold                   | ↑ 62-fold            | ✓ 11%           |
| <b>17</b>            | ↑ 15-fold                   | ↑ 14-fold            | ↔               | ↑ 177-fold                  | ↑ 134-fold           | ✓ 24%           |
| <b>24</b>            | ↑ 27-fold                   | ↑ 17-fold            | ✓ 37%           | ↑ 201-fold                  | ↑ 182-fold           | ✓ 10%           |
| <b>Urine</b>         |                             |                      |                 |                             |                      |                 |
| <b>3</b>             | ↑ 57%                       | ↑ 58%                | ↔               | ↑ 3.6-fold                  | ↑ 4.4-fold           | ↗ 21.1%         |
| <b>10</b>            | ↑ 39%                       | ↑ 47%                | ↔               | ↑ 3-fold                    | ↑ 3.8-fold           | ↗ 25%           |
| <b>17</b>            | ↑ 41%                       | ↑ 44%                | ↔               | ↑ 2.8%                      | ↑ 3.9%               | ↗ 33%           |
| <b>24</b>            | ↑ 53%                       | ↑ 56%                | ↔               | ↑ 3.1-fold                  | ↑ 3.7-fold           | ↗ 22%           |

<sup>1</sup> The rats received 0.1% aqueous AE and Cd in diet at the concentration of 1 or 5 mg/kg for 3–24 months.

<sup>2</sup> Table presents changes in Cd concentration ( $p < 0.05$ ) compared to the control group: a percentage or factor of increase (↑), and the respective group receiving Cd alone: a percentage decrease (✓), increase (↗), or lack of statistically significant change (↔)  $p > 0.05$ ; ANOVA, Duncan's multiple range test), are indicated.

<sup>3</sup> Detailed data on the impact of AE on the concentration of Cd in the blood, liver and urine of rats exposed to this heavy metal have already been published [27] and are presented in Table S1.

**Table S3.** Polyphenolic composition of the extract from the berries of *Aronia melanocarpa* L. (AE). <sup>1,2</sup>

| COMPOUND                   | Concentration (mg/g) |
|----------------------------|----------------------|
| Total polyphenols          | 612.40 ± 3.33        |
| Total anthocyanins         | 202.28 ± 1.28        |
| Total proanthocyanidins    | 129.87 ± 1.12        |
| Total phenolic acids       | 110.92 ± 0.89        |
| Total flavonoids           | 21.94 ± 0.98         |
| Chlorogenic acid           | 68.32 ± 0.08         |
| Cyanidin 3-O-β-galactoside | 80.07 ± 1.05         |
| Cyanidin 3-O-α-arabinoside | 33.21 ± 0.01         |
| Cyanidin 3-O-β-glucoside   | 3.68 ± 0.01          |

<sup>1</sup> The concentrations of total polyphenols, total phenolic acids, flavonoids, proanthocyanidins, and anthocyanins in the aronia extract by Adamed Consumer Healthcare were determined spectrophotometrically [27,28]. Ultra Performance Liquid Chromatography was used to evaluate the polyphenolic profile of the extract and quantificate chlorogenic acid and anthocyanins (cyanidin 3-O-β-galactoside, cyanidin 3-O-α-arabinoside, and cyanidin 3-O-β-glucoside [27].

<sup>2</sup> Data are represented as mean ± SE for 3 independent measurements.

**Table S4.** The intake of cadmium (Cd) and the extract from the berries of *Aronia melanocarpa* L. (AE) in particular experimental groups. <sup>1, 2, 3, 4</sup>

| GROUP                                     | Duration of the Experiment |                      |                      |                      |
|-------------------------------------------|----------------------------|----------------------|----------------------|----------------------|
|                                           | 3 Months                   | 10 Months            | 17 Months            | 24 Months            |
| Daily Cd Intake ( $\mu\text{g/kg b.w.}$ ) |                            |                      |                      |                      |
| Control                                   | 4.709 $\pm$ 0.067          | 2.716 $\pm$ 0.060    | 2.582 $\pm$ 0.047    | 2.597 $\pm$ 0.051    |
| AE                                        | 4.615 $\pm$ 0.065          | 2.935 $\pm$ 0.063    | 2.410 $\pm$ 0.046    | 2.764 $\pm$ 0.059    |
| Cd <sub>1</sub>                           | 77.50 $\pm$ 1.264***       | 43.85 $\pm$ 0.60***  | 43.41 $\pm$ 0.64***  | 43.22 $\pm$ 0.85***  |
| Cd <sub>1</sub> + AE                      | 80.93 $\pm$ 1.06***        | 46.90 $\pm$ 0.84***  | 40.15 $\pm$ 0.77***  | 48.12 $\pm$ 0.94***  |
| Cd <sub>5</sub>                           | 383.65 $\pm$ 4.44***       | 235.78 $\pm$ 2.55*** | 214.54 $\pm$ 2.83*** | 253.75 $\pm$ 8.63*** |
| Cd <sub>5</sub> + AE                      | 385.92 $\pm$ 4.91***       | 239.66 $\pm$ 1.43*** | 208.75 $\pm$ 3.04*** | 252.06 $\pm$ 9.29*** |
| Daily AE Intake (mg/kg b.w.)              |                            |                      |                      |                      |
| AE                                        | 91.53 $\pm$ 1.12           | 62.29 $\pm$ 1.87     | 53.22 $\pm$ 1.14     | 47.96 $\pm$ 1.56     |
| Cd <sub>1</sub> + AE                      | 97.47 $\pm$ 1.45           | 60.92 $\pm$ 1.07     | 55.00 $\pm$ 0.76     | 49.26 $\pm$ 1.57     |
| Cd <sub>5</sub> + AE                      | 92.41 $\pm$ 1.30           | 65.14 $\pm$ 1.77     | 56.02 $\pm$ 1.15     | 48.26 $\pm$ 2.07     |

<sup>1</sup> The rats received 0.1% aqueous AE and Cd in diet at the concentration of 1 or 5 mg/kg for 3–24 months.

<sup>2</sup> Data are represented as mean  $\pm$  SE for 8 rats (except for 7 animals in the AE, Cd<sub>1</sub>, and Cd<sub>5</sub> groups after 24 months).

<sup>3</sup> The intake of Cd in the control group and the group receiving AE alone was calculated based on this metal concentration determined by us in the standard diet (0.0584 mg/kg) [27], whereas this xenobiotic intake in the groups exposed to Cd (1 or 5 mg Cd/kg) was calculated based on its concentration in the feed declared by the manufacturer. Statistically significant differences (ANOVA, Duncan's multiple range test) compared to the control group (\*\*\*)  $p < 0.001$  are marked.

<sup>4</sup> The intake of polyphenols was calculated assuming that the AE contained 65.74% of these compounds (manufacturer's data). The intake of polyphenols in the control group, Cd<sub>1</sub> group, and Cd<sub>5</sub> group was 0. There were no statistically significant differences ( $p > 0.05$ ; ANOVA, Duncan's multiple range test) in the intake of polyphenolic compounds between the AE, Cd<sub>1</sub> + AE, and Cd<sub>5</sub> + AE groups.

**Table S5.** Main and interactive effects of cadmium (Cd) and the extract from the berries of *Aronia melanocarpa* L. (AE) on the activities of superoxide dismutase (SOD) and catalase (CAT) in the liver of rats. <sup>1,2</sup>

| Duration (months) | Parameter | Exposure to 1 mg Cd/kg diet |                   |                        | Exposure to 5 mg Cd/kg diet |                   |                        |
|-------------------|-----------|-----------------------------|-------------------|------------------------|-----------------------------|-------------------|------------------------|
|                   |           | Main effect of Cd           | Main effect of AE | Main effect of Cd + AE | Main effect of Cd           | Main effect of AE | Main effect of Cd + AE |
| 3                 | SOD       | 23.85***                    | NS                | NS                     | -                           | -                 | -                      |
|                   | CAT       | -                           | -                 | -                      | 18.95***                    | NS                | NS                     |
| 10                | SOD       | 32.75***                    | NS                | NS                     | -                           | -                 | -                      |
|                   | CAT       | NS                          | 6.852*            | NS                     | -                           | -                 | -                      |
| 17                | SOD       | 11.21**                     | NS                | NS                     | NS                          | 4.370*            | 7.152*                 |
|                   | CAT       | 5.191*                      | 5.337*            | NS                     | 42.79***                    | NS                | 5.415*                 |
| 24                | SOD       | -                           | -                 | -                      | NS                          | 4.650*            | 8.478**                |
|                   | CAT       | 29.48***                    | NS                | 7.723*                 | NS                          | NS                | 4.961*                 |

<sup>1</sup> The rats received 0.1% aqueous AE and Cd in diet at the concentration of 1 or 5 mg/kg for 3–24 months.

<sup>2</sup> The results of the ANOVA/MANOVA analysis are presented as F values and the level of statistical significance (*p*). F values having *p* < 0.05 were considered statistically significant (\* *p* < 0.05, \*\* *p* < 0.01, \*\*\* *p* < 0.001). NS – not statistically significant (*p* > 0.05). In the case when a one way-analysis of variance (ANOVA, Duncan's multiple range test) revealed any influence of the co-administration of Cd and AE on the investigated parameter, a two-way analysis of variance (ANOVA/MANOVA, test F) was conducted in aim to discern possible interactive and independent impact of Cd and AE on this parameter.

**Table S6.** Main and interactive effects of cadmium (Cd) and the extract from the berries of *Aronia melanocarpa* L. (AE) on the activities of glutathione peroxidase (GPx) and glutathione reductase (GR) and the concentration of glutathione S-transferase (GST) in the liver of rats. <sup>1,2</sup>

| Duration (months) | Parameter | Exposure to 1 mg Cd/kg diet |                   |                        | Exposure to 5 mg Cd/kg diet |                   |                        |
|-------------------|-----------|-----------------------------|-------------------|------------------------|-----------------------------|-------------------|------------------------|
|                   |           | Main effect of Cd           | Main effect of AE | Main effect of Cd + AE | Main effect of Cd           | Main effect of AE | Main effect of Cd + AE |
| 3                 | GPx       | 9.127*                      | 8.329*            | NS                     | 61.56***                    | NS                | NS                     |
|                   | GR        | NS                          | 21.72***          | NS                     | 57.36***                    | NS                | 13.24**                |
|                   | GST       | 5.970*                      | NS                | NS                     | 16.3***                     | NS                | NS                     |
| 10                | GPx       | NS                          | NS                | 6.242*                 | 9.702**                     | NS                | 11.77**                |
|                   | GR        | 5.076*                      | NS                | NS                     | 8.671**                     | NS                | NS                     |
|                   | GST       | 15.17***                    | 9.913**           | 8.917**                | 22.58***                    | NS                | NS                     |
| 17                | GPx       | 23.88***                    | NS                | 7.996*                 | 12.96**                     | NS                | 8.988**                |
|                   | GR        | -                           | -                 | -                      | 16.07***                    | NS                | NS                     |
|                   | GST       | NS                          | NS                | 16.48***               | NS                          | NS                | 12.11**                |
| 24                | GPx       | 51.06***                    | NS                | 12.78**                | 18.46***                    | NS                | 30.31***               |
|                   | GR        | NS                          | 34.18***          | 16.08***               | 5.790*                      | 10.81**           | NS                     |
|                   | GST       | -                           | -                 | -                      | NS                          | 6.998*            | 10.43**                |

<sup>1</sup> The rats received 0.1% aqueous AE and Cd in diet at the concentration of 1 or 5 mg/kg for 3–24 months.

<sup>2</sup> The results of the ANOVA/MANOVA analysis are presented as F values and the level of statistical significance (*p*). F values having *p* < 0.05 were considered statistically significant (\* *p* < 0.05, \*\* *p* < 0.01, \*\*\* *p* < 0.001). NS – not statistically significant (*p* > 0.05). In the case when a one way-analysis of variance (ANOVA, Duncan's multiple range test) revealed any influence of the co-administration of Cd and AE on the investigated parameter, a two-way analysis of variance (ANOVA/MANOVA, test F) was conducted in aim to discern possible interactive and independent impact of Cd and AE on this parameter.

**Table S7.** Main and interactive effects of cadmium (Cd) and the extract from the berries of *Aronia melanocarpa* L. (AE) on the concentrations of reduced glutathione (GSH), oxidized glutathione (GSSG), and the ratio of GSH/GSSG, as well as the concentration of total thiol groups (TSH) in the liver of rats.<sup>1,2</sup>

| Duration (months) | Parameter | Exposure to 1 mg Cd/kg diet |                   |                        | Exposure to 5 mg Cd/kg diet |                   |                        |
|-------------------|-----------|-----------------------------|-------------------|------------------------|-----------------------------|-------------------|------------------------|
|                   |           | Main effect of Cd           | Main effect of AE | Main effect of Cd + AE | Main effect of Cd           | Main effect of AE | Main effect of Cd + AE |
| 3                 | GSH       | -                           | -                 | -                      | -                           | -                 | -                      |
|                   | GSSG      | -                           | -                 | -                      | NS                          | NS                | 15.09***               |
|                   | GSH/GSSG  | -                           | -                 | -                      | NS                          | 25.60***          | 11.05**                |
|                   | TSH       | NS                          | 6.444*            | 12.93**                | 7.320*                      | NS                | 47.82*                 |
| 10                | GSH       | 13.83***                    | NS                | NS                     | NS                          | NS                | 7.440*                 |
|                   | GSSG      | 6.901*                      | 8.813*            | 4.312*                 | 27.43***                    | 10.04**           | NS                     |
|                   | GSH/GSSG  | NS                          | 8.450*            | 9.319**                | NS                          | 4.852*            | 5.543*                 |
|                   | TSH       | NS                          | 5.346*            | 26.05*                 | NS                          | NS                | 19.47*                 |
| 17                | GSH       | 8.085*                      | NS                | NS                     | 10.95**                     | 5.444*            | NS                     |
|                   | GSSG      | NS                          | 10.98**           | NS                     | NS                          | 33.16***          | 13.64***               |
|                   | GSH/GSSG  | NS                          | 15.59***          | NS                     | NS                          | 34.03***          | 15.52***               |
|                   | TSH       | 5.267*                      | NS                | 14.45***               | 13.43**                     | NS                | 7.760**                |
| 24                | GSH       | NS                          | NS                | 8.384*                 | NS                          | 4.752*            | 10.68**                |
|                   | GSSG      | 10.887**                    | 44.01***          | NS                     | 11.22**                     | 81.91***          | NS                     |
|                   | GSH/GSSG  | 6.022*                      | 24.41***          | NS                     | NS                          | 41.89***          | NS                     |
|                   | TSH       | NS                          | 30.21**           | NS                     | NS                          | 35.90***          | NS                     |

<sup>1</sup> The rats received 0.1% aqueous AE and Cd in diet at the concentration of 1 or 5 mg/kg for 3–24 months.

<sup>2</sup> The results of the ANOVA/MANOVA analysis are presented as F values and the level of statistical significance (*p*). F values having *p* < 0.05 were considered statistically significant (\* *p* < 0.05, \*\* *p* < 0.01, \*\*\* *p* < 0.001). NS – not statistically significant (*p* > 0.05). In the case when a one way-analysis of variance (ANOVA, Duncan's multiple range test) revealed any influence of the co-administration of Cd and AE on the investigated parameter, a two-way analysis of variance (ANOVA/MANOVA, test F) was conducted in aim to discern possible interactive and independent impact of Cd and AE on this parameter.



**Table S8.** Effect of the extract from the berries of *Aronia melanocarpa* L. (AE) on the concentration of thioredoxin (Trx) in the liver of rats exposed to cadmium (Cd). <sup>1,2</sup>

| Group                      | Duration of the Experiment |               |               |                               |
|----------------------------|----------------------------|---------------|---------------|-------------------------------|
|                            | 3 Months                   | 10 Months     | 17 Months     | 24 Months                     |
| <b>Trx (ng/mg protein)</b> |                            |               |               |                               |
| Control                    | 0.152 ± 0.015              | 0.236 ± 0.017 | 0.152 ± 0.009 | 0.153 ± 0.016                 |
| AE                         | 0.146 ± 0.018              | 0.239 ± 0.017 | 0.158 ± 0.015 | 0.186 ± 0.026                 |
| Cd <sub>1</sub>            | 0.163 ± 0.016              | 0.258 ± 0.007 | 0.174 ± 0.016 | 0.173 ± 0.021                 |
| Cd <sub>1</sub> + AE       | 0.138 ± 0.008              | 0.246 ± 0.019 | 0.143 ± 0.019 | 0.199 ± 0.014                 |
| Cd <sub>5</sub>            | 0.150 ± 0.017              | 0.196 ± 0.011 | 0.168 ± 0.012 | 0.167 ± 0.007                 |
| Cd <sub>5</sub> + AE       | 0.155 ± 0.017              | 0.235 ± 0.017 | 0.162 ± 0.011 | 0.243 ± 0.016 <sup>**†‡</sup> |

<sup>1</sup> The rats received 0.1% aqueous AE and Cd in diet at the concentration of 1 or 5 mg/kg for 3–24 months.

<sup>2</sup> Data are represented as mean ± SE for 8 rats (except for 7 animals in the AE, Cd<sub>1</sub> and Cd<sub>5</sub> groups after 24 months). Statistically significant differences (ANOVA, Duncan's multiple range test) compared to the control group (<sup>\*</sup>  $p < 0.01$ ), group intoxicated with 5 mg Cd/kg diet alone (<sup>††</sup>  $p < 0.01$ ), and group receiving AE alone (<sup>‡</sup>  $p < 0.05$ ) are marked.

**Table S9.** Main and interactive effects of cadmium (Cd) and the extract from the berries of *Aronia melanocarpa* L. (AE) on the concentrations of hydrogen peroxide (H<sub>2</sub>O<sub>2</sub>), myeloperoxidase (MPO), and xanthine oxidase (XOD) in the liver of rats.<sup>1,2</sup>

| Duration (months) | Parameter                     | Exposure to 1 mg Cd/kg diet |                   |                        | Exposure to 5 mg Cd/kg diet |                   |                        |
|-------------------|-------------------------------|-----------------------------|-------------------|------------------------|-----------------------------|-------------------|------------------------|
|                   |                               | Main effect of Cd           | Main effect of AE | Main effect of Cd + AE | Main effect of Cd           | Main effect of AE | Main effect of Cd + AE |
| 3                 | H <sub>2</sub> O <sub>2</sub> | NS                          | 13.93**           | NS                     | NS                          | 9.818**           | NS                     |
|                   | MPO                           | NS                          | NS                | NS                     | NS                          | NS                | 6.790*                 |
|                   | XOD                           | NS                          | 13.35**           | NS                     | NS                          | 15.45**           | NS                     |
| 10                | H <sub>2</sub> O <sub>2</sub> | 18.70**                     | 26.93**           | 21.02**                | 26.81**                     | 27.75**           | 21.05**                |
|                   | MPO                           | 13.01**                     | 7.045*            | 10.97**                | NS                          | NS                | 5.710*                 |
|                   | XOD                           | 14.09**                     | 5.003*            | 11.72**                | NS                          | NS                | 12.75**                |
| 17                | H <sub>2</sub> O <sub>2</sub> | 29.54**                     | 57.73**           | 78.96**                | 61.98**                     | 103.3**           | 137.6**                |
|                   | MPO                           | 4.684*                      | 22.84**           | 8.230**                | 6.180*                      | 22.83**           | 8.717**                |
|                   | XOD                           | NS                          | 30.02**           | 11.76**                | 15.13**                     | 58.18**           | 36.78**                |
| 24                | H <sub>2</sub> O <sub>2</sub> | 70.28**                     | 71.69**           | 63.92**                | 60.62**                     | 67.56**           | 60.72**                |
|                   | MPO                           | NS                          | 7.622*            | 5.008*                 | NS                          | 13.00**           | 7.976**                |
|                   | XOD                           | 6.310*                      | 13.15**           | 20.72**                | 9.778**                     | 23.71**           | 32.74**                |

<sup>1</sup> The rats received 0.1% aqueous AE and Cd in diet at the concentration of 1 or 5 mg/kg for 3–24 months.

<sup>2</sup> The results of the ANOVA/MANOVA analysis are presented as F values and the level of statistical significance (*p*). F values having *p* < 0.05 were considered statistically significant (\* *p* < 0.05, \*\* *p* < 0.01, \*\*\* *p* < 0.001). NS – not statistically significant (*p* > 0.05). In the case when a one way-analysis of variance (ANOVA, Duncan's multiple range test) revealed any influence of the co-administration of Cd and AE on the investigated parameter, a two-way analysis of variance (ANOVA/MANOVA, test F) was conducted in aim to discern possible interactive and independent impact of Cd and AE on this parameter.

**Table S10.** Main and interactive effects of cadmium (Cd) and the extract from the berries of *Aronia melanocarpa* L. (AE) on the total antioxidative status (TAS), total oxidative status (TOS) and the index of oxidative stress (OSI) in the liver of rats. <sup>1,2</sup>

| Duration (months) | Parameter | Exposure to 1 mg Cd/kg diet |                   |                        | Exposure to 5 mg Cd/kg diet |                   |                        |
|-------------------|-----------|-----------------------------|-------------------|------------------------|-----------------------------|-------------------|------------------------|
|                   |           | Main effect of Cd           | Main effect of AE | Main effect of Cd + AE | Main effect of Cd           | Main effect of AE | Main effect of Cd + AE |
| 3                 | TOS       | -                           | -                 | -                      | -                           | -                 | -                      |
|                   | TAS       | -                           | -                 | -                      | -                           | -                 | -                      |
|                   | OSI       | -                           | -                 | -                      | NS                          | 9.160**           | 6.344*                 |
| 10                | TOS       | 27.04***                    | NS                | NS                     | 7.025*                      | NS                | NS                     |
|                   | TAS       | 4.410*                      | 6.670*            | 6.062*                 | NS                          | NS                | NS                     |
|                   | OSI       | 44.87***                    | 101.2***          | 50.51***               | 11.05**                     | 17.93**           | 5.934*                 |
| 17                | TOS       | 26.68***                    | NS                | NS                     | -                           | -                 | -                      |
|                   | TAS       | NS                          | NS                | NS                     | NS                          | NS                | NS                     |
|                   | OSI       | 22.54***                    | 21.73***          | 31.99***               | 13.85***                    | 13.60**           | 23.47***               |
| 24                | TOS       | -                           | -                 | -                      | 44.22***                    | 6.251*            | NS                     |
|                   | TAS       | NS                          | 6.094*            | 14.79***               | 13.85***                    | 13.60**           | 23.47***               |
|                   | OSI       | 10.85**                     | NS                | 11.87**                | 21.13***                    | 31.37***          | 54.51***               |

<sup>1</sup> The rats received 0.1% aqueous AE and Cd in diet at the concentration of 1 or 5 mg/kg for 3–24 months.

<sup>2</sup> The results of the ANOVA/MANOVA analysis are presented as F values and the level of statistical significance ( $p$ ). F values having  $p < 0.05$  were considered statistically significant (\*  $p < 0.05$ , \*\*  $p < 0.01$ , \*\*\*  $p < 0.001$ ). NS – not statistically significant ( $p > 0.05$ ). In the case when a one way-analysis of variance (ANOVA, Duncan's multiple range test) revealed any influence of the co-administration of Cd and AE on the investigated parameter, a two-way analysis of variance (ANOVA/MANOVA, test F) was conducted in aim to discern possible interactive and independent impact of Cd and AE on this parameter.

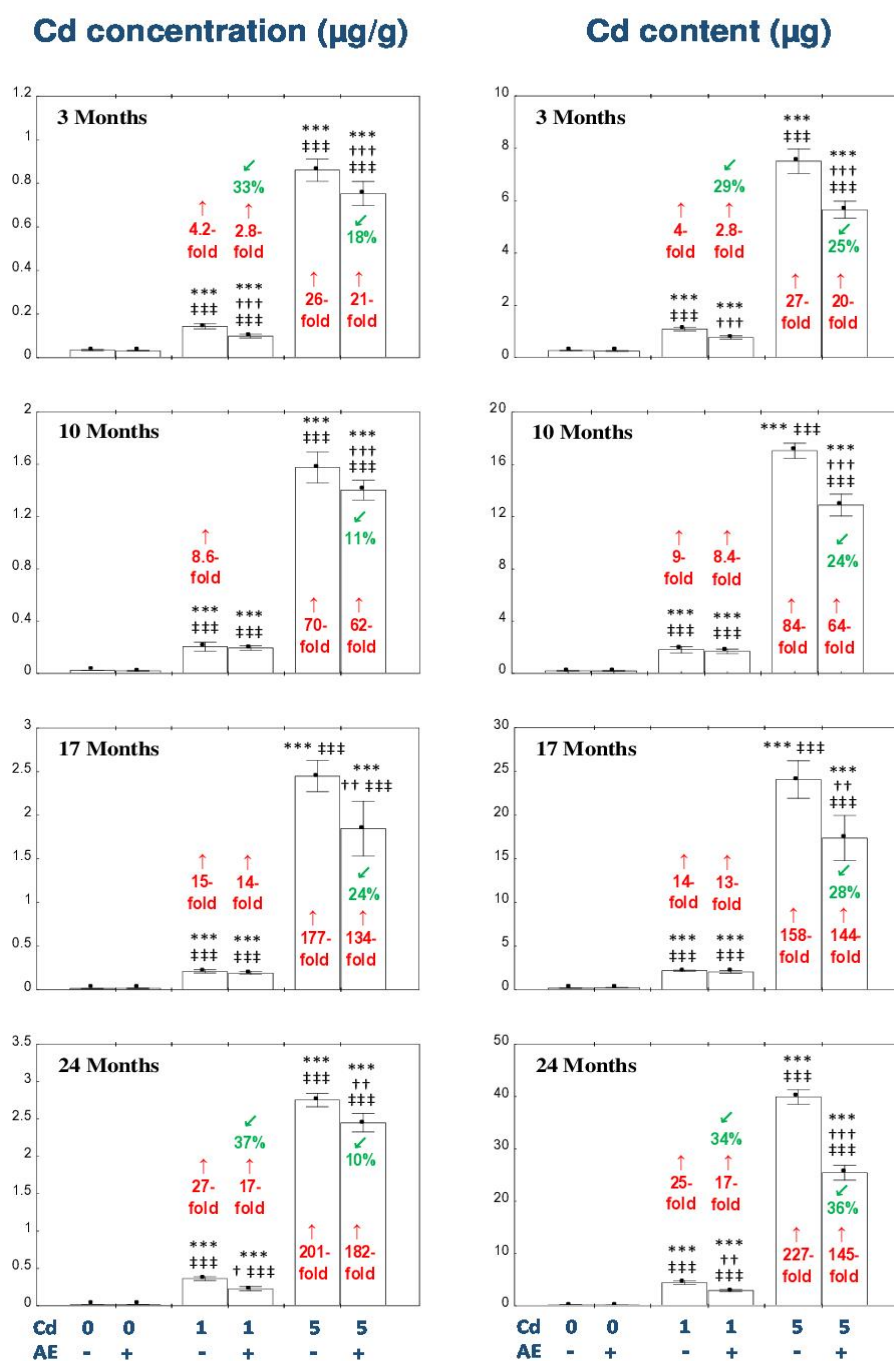

**Figure S1.** The effect of the extract from the berries of *Aronia melanocarpa* L. (AE) on the concentration and content of cadmium (Cd) in the liver of rats exposed to this metal. The rats received Cd in the diet at the concentration of 0, 1, and 5 mg Cd/kg and/or 0.1% aqueous AE (+) or not (-). Data are presented as mean  $\pm$  SE for 8 rats, except for 7 animals in the AE, Cd<sub>1</sub>, and Cd<sub>5</sub> group after 24 months. Statistically significant differences (ANOVA, Duncan's multiple range test): \*\*\* $p$  < 0.001 vs. control group; \*\* $p$  < 0.01, + $p$  < 0.001 vs. respective group intoxicated with Cd alone; ### $p$  < 0.001 vs. group receiving AE alone. Numerical values in bars or above the bars disclose the percentage changes or factors of changes in comparison to the control group ( $\uparrow$ , increase) or the respective group receiving Cd alone ( $\checkmark$ , decrease). Detailed data on Cd concentration in the liver are presented in Table S1 [27]. Cd content in the liver in the control group reached  $0.27510 \pm 0.0265$   $\mu\text{g}$ ,  $0.2024 \pm 0.0129$   $\mu\text{g}$ ,  $0.1525 \pm 0.0216$   $\mu\text{g}$ , and  $0.1747 \pm 0.0231$   $\mu\text{g}$  after 3, 10, 17, and 24 months, respectively [27].
